# Supplementary material
Source: PubMed Central journal article supplement (PMC3400989)
Supplement: 97320630008613S1.pdf [file 97320630008613S1.pdf]

## Supplementary material:

**Table 1:** Prevalence of gender-wise metabolic syndrome.

| <b>Metabolic Syndrome (N = 500)</b> | <b>Women (%)</b> | <b>Men (%)</b> |
|-------------------------------------|------------------|----------------|
| Metabolic Syndrome present          | 60 (29.13 %)     | 68 (23.13%)    |
| Metabolic Syndrome absent           | 146 (70.87%)     | 226 (76.87%)   |
